# Supplementary material for: miR-145a-5p Promotes Myoblast Differentiation
Source: Hindawi journal article supplement (doi:10.1155/2016/5276271), 2016-01-01
Supplement: f1 [file 5276271.f1.pdf]

| Gene     | Full name                                               | Function                                                                        | References |
|----------|---------------------------------------------------------|---------------------------------------------------------------------------------|------------|
| Gabarap1 | GABA receptor-associated protein 1                      | Involve in contractile dysfunction of muscle and muscle wasting                 | (1, 2)     |
| Kif21a   | Kinesin family member 21A                               | Relate to muscle fibrosis                                                       | (3)        |
| Akap9    | A kinase-anchoring protein 9                            | Involve in myoblast differentiation and airway smooth muscle secretory function | (4)        |
| Ccnd2    | Cyclin D2                                               | Enhance myogenic differentiation and induce regeneration                        | (5)        |
| Ctsb     | Cathepsin B                                             | Relate to muscle proteolytic system                                             | (6)        |
| Phactr1  | The protein phosphatase and actin regulator 1           | Relate to G-Actin                                                               | (7)        |
| Scd1     | Stearoyl-CoA desaturase 1                               | Regulate glucose metabolism of muscle                                           | (8, 9)     |
| Tgfb2    | The type II transforming growth factor $\beta$ receptor | Regulate smooth muscle differentiation and skeletal development                 | (10, 11)   |

TABLE S1: Genes related to the muscle development.

#### References:

- [1]. Gaugler M, Brown A, Merrell E, DiSanto-Rose M, Rathmacher JA, Reynolds TH. "PKB signaling and atrogene expression in skeletal muscle of aged mice," *Journal of Applied Physiology*, vol. 111, n. 1, pp. 192-199, 2011.
- [2]. Lecker SH, JAGOE RT, GILBERT A, GOMES M, BARACOS V, BAILEY J, et al. "Multiple types of skeletal muscle atrophy involve a common program of changes in gene expression," *The FASEB Journal*, vol. 18, n. 1, pp. 39-51, 2004.
- [3]. Yamada K, Andrews C, Chan W-M, McKeown CA, Magli A, de Berardinis T, et al. "Heterozygous mutations of the kinesin KIF21A in congenital fibrosis of the extraocular muscles type 1 (CFEOM1)," *Nature genetics*, vol. 35, n. 4, pp. 318-321, 2003.
- [4]. Karolczak J, Sobczak M, Skowronek K, Rędownicz MJ. "A Kinase Anchoring Protein 9 Is a Novel Myosin VI Binding Partner That Links Myosin VI with the PKA Pathway in Myogenic Cells," *BioMed research international*, vol. 2015, Article ID 816019, 2015.

- [5]. Khanjyan MV, Yang J, Kayali R, Caldwell T, Bertoni C. "A high-content, high-throughput siRNA screen identifies cyclin D2 as a potent regulator of muscle progenitor cell fusion and a target to enhance muscle regeneration," *Human molecular genetics*, vol. 22, n. 16, pp. 3283-3295, 2013.
- [6]. Nishimura M, Mikura M, Hirasaka K, Okumura Y, Nikawa T, Kawano Y, et al. "Effects of dimethyl sulphoxide and dexamethasone on mRNA expression of myogenesis-and muscle proteolytic system-related genes in mouse myoblastic C2C12 cells," *Journal of biochemistry*, vol. 144, n. 6, pp. 717-724, 2008.
- [7]. Mouilleron S, Wiezlak M, O'Reilly N, Treisman R, McDonald NQ. "Structures of the Phactr1 RPEL domain and RPEL motif complexes with G-actin reveal the molecular basis for actin binding cooperativity," *Structure*, vol. 20, n. 11, pp. 1960-1970, 2012.
- [8]. Rogowski MP, Flowers MT, Stamatikos AD, Ntambi JM, Paton CM. "SCD1 activity in muscle increases triglyceride PUFA content, exercise capacity, and PPAR $\delta$  expression in mice," *Journal of lipid research*, vol. 54, n. 10, pp. 2636-2346, 2013.
- [9]. Parra P, Serra F, Palou A. "Transcriptional analysis reveals a high impact of conjugated linoleic acid on stearoyl-Coenzyme A desaturase 1 mRNA expression in mice gastrocnemius muscle," *Genes & nutrition*, vol. 7, n. 4, pp. 537-548, 2012.
- [10]. Frutkin AD, Shi H, Otsuka G, Levéen P, Karlsson S, Dichek DA. "A critical developmental role for *tgfbr2* in myogenic cell lineages is revealed in mice expressing SM22-Cre, not SMMHC-Cre," *Journal of molecular and cellular cardiology*, vol. 41, n. 4, pp. 724-731, 2006.
- [11]. Choudhary B, Ito Y, Makita T, Sasaki T, Chai Y, Sucov HM. "Cardiovascular malformations with normal smooth muscle differentiation in neural crest-specific type II TGF $\beta$  receptor (*Tgfbr2*) mutant mice," *Developmental biology*, vol. 289, n. 2, pp. 420-429, 2006.
